# Supplementary material for: GAA variants and phenotypes among 1,079 patients with Pompe disease: Data from the Pompe Registry
Source: PubMed Central journal article supplement (PMC6852536; doi:10.1002/humu.23878), 2019-08-07
Supplement: HUMU-40-2146-s001.pdf [file HUMU-40-2146-s001.pdf]

## SUPPORTING INFORMATION

### Description of Methods Used to Identify Novel (Those Not Previously Published or Identified) Variants and the Likely Impact of These Novel Variants

Allele frequencies used to identify novel variants were extracted from the following sources, with hyperlinks to their online websites and references with details and descriptions of each:

- The Genome Aggregation Database (<http://gnomad.broadinstitute.org/>) (Genome Aggregation Database (gnomAD), 2017)
- The Exome Aggregation Consortium (<http://exac.broadinstitute.org/>) (Lek et al., 2016)
- The NHLBI Exome Sequencing Project (<https://esp.gs.washington.edu/drupal/>) (Tennesen et al., 2012)
- 1000 genome project consortium (<http://www.internationalgenome.org/>) (Genomes Project Consortium et al., 2015)
- [National Center for Biotechnology Information Database Resources](#) (NCBI Resource Coordinators, 2014)

The relationship between variants and human phenotype was analyzed using the public archive Clinvar (Landrum et al., 2014), and the Human Genome Mutation Database (HGMD) (Stenson et al., 2014).

The likely impact of variant was predicted using bioinformatics algorithms, such as PROVEAN (Choi et al., 2012), SIFT (Sim et al., 2012), PolyPhen (Adzhubei et al., 2010), and FATHMM (Shihab et al., 2015), as described below, and based on a number of criteria recommended in the ACMG Standards and Guidelines for the interpretation of sequence variants (Richards et al., 2015) and Guidelines for Reporting and Using Prediction Tools for Genetic Variant Analysis (Vihinen et al., 2012). Results are provided in TABLE 3 of the main manuscript.

Combination of potentially multiple records in dbNSFP when transcripts with different Ref and Alt amino acids overlapped at a specific position was performed. The worst of the predictions was kept for SIFT, PolyPhen, and FATHMM. If SIFT was smaller than 0.05 (rankscore>0.55) the corresponding NS was predicted as "Damaging"; otherwise it was predicted as "Tolerated". PolyPhen-2 prediction based on HumVar, was "probably damaging", HVAR score in [0.909,1] or rankscore in [0.62955,0.9711]); "possibly damaging", HVAR in [0.447,0.908] or rankscore in [0.44359,0.62885]); and "benign", HVAR score in [0,0.446] or rankscore in [0.01281,0.44315]). Score cutoff for binary classification was 0.5 for HVAR score or 0.45998 for rankscore, i.e., the prediction was "neutral" if the HVAR score was smaller than 0.5 (rankscore smaller than 0.45998), and "deleterious" if the HVAR score was larger than 0.5 (rankscore larger than 0.45998). If a FATHMM-MKL\_coding\_score was >0.5 (or rankscore >0.28317) the corresponding nsSNV was predicted as "Damaging"; otherwise it was predicted as "Tolerated".

## SUPPORTING REFERENCES

- Adzhubei, I. A., Schmidt, S., Peshkin, L., Ramensky, V. E., Gerasimova, A., Bork, P., . . . Sunyaev, S. R. (2010). A method and server for predicting damaging missense mutations. *Nature Methods*, 7(4), 248-249. doi: 10.1038/nmeth0410-248
- Choi, Y., Sims, G. E., Murphy, S., Miller, J. R., & Chan, A. P. (2012). Predicting the functional effect of amino acid substitutions and indels. *PLoS One*, 7(10), e46688. doi: 10.1371/journal.pone.0046688
- Genome Aggregation Database (gnomAD). (2017). GAA glucosidase, alpha; acid. Retrieved June 30, 2017 from <https://gnomad.broadinstitute.org/gene/ENSG00000171298>.
- Genomes Project Consortium, Auton, A., Brooks, L. D., Durbin, R. M., Garrison, E. P., Kang, H. M., . . . Abecasis, G. R. (2015). A global reference for human genetic variation. *Nature*, 526(7571), 68-74. doi: 10.1038/nature15393
- Landrum, M. J., Lee, J. M., Riley, G. R., Jang, W., Rubinstein, W. S., Church, D. M., & Maglott, D. R. (2014). ClinVar: public archive of relationships among sequence variation and human phenotype. *Nucleic Acids Research*, 42(Database issue), D980-D985. doi: 10.1093/nar/gkt1113
- Lek, M., Karczewski, K. J., Minikel, E. V., Samocha, K. E., Banks, E., Fennell, T., . . . Exome Aggregation, C. (2016). Analysis of protein-coding genetic variation in 60,706 humans. *Nature*, 536(7616), 285-291. doi: 10.1038/nature19057
- NCBI Resource Coordinators. (2014). Database Resources for the National Center for Biotechnology Information. *Nucleic Acids Research*, 42(Database Issue), D7-D17.
- Richards, S., Aziz, N., Bale, S., Bick, D., Das, S., Gastier-Foster, J., . . . Committee, A. L. Q. A. (2015). Standards and guidelines for the interpretation of sequence variants: a joint consensus recommendation of the American College of Medical Genetics and Genomics and the Association for Molecular Pathology. *Genetics in Medicine*, 17(5), 405-424. doi: 10.1038/gim.2015.30
- Shihab, H. A., Rogers, M. F., Gough, J., Mort, M., Cooper, D. N., Day, I. N., . . . Campbell, C. (2015). An integrative approach to predicting the functional effects of non-coding and coding sequence variation. *Bioinformatics*, 31(10), 1536-1543. doi: 10.1093/bioinformatics/btv009
- Sim, N. L., Kumar, P., Hu, J., Henikoff, S., Schneider, G., & Ng, P. C. (2012). SIFT web server: predicting effects of amino acid substitutions on proteins. *Nucleic Acids Research*, 40(Web Server issue), W452-457. doi: 10.1093/nar/gks539
- Stenson, P. D., Mort, M., Ball, E. V., Shaw, K., Phillips, A., & Cooper, D. N. (2014). The Human Gene Mutation Database: building a comprehensive mutation repository for clinical and molecular genetics, diagnostic testing and personalized genomic medicine. *Human Genetics*, 133(1), 1-9. doi: 10.1007/s00439-013-1358-4
- Tennessen, J. A., Bigham, A. W., O'Connor, T. D., Fu, W., Kenny, E. E., Gravel, S., . . . Project, N. E. S. (2012). Evolution and functional impact of rare coding variation from deep sequencing of human exomes. *Science*, 337(6090), 64-69. doi: 10.1126/science.1219240
- Vihinen, M., den Dunnen, J. T., Dalgleish, R., & Cotton, R. G. (2012). Guidelines for establishing locus specific databases. *Human Mutation*, 33(2), 298-305. doi: 10.1002/humu.21646

**SUPPORTING INFORMATION TABLE S1. Distribution of Unique Known Variants Among Patients in Phenotypic Subgroups<sup>†</sup>**

| <b>Location</b> | <b>DNA<sup>‡</sup></b>                                     | <b>Protein<sup>§</sup></b> | <b>N Variants</b> | <b>Group<sup>¶</sup></b> |
|-----------------|------------------------------------------------------------|----------------------------|-------------------|--------------------------|
| intron1         | c.-32-13T>G                                                | p.?                        | 689               | B,C                      |
| intron1         | c.-32-17_-32-10delinsTCCCTGCT<br>GAGCCTCCTACAGGCCT<br>CCCG | p.?                        | <5                | A,B                      |
| intron1         | c.-32-3C>A                                                 | p.?                        | <5                | C                        |
| intron1         | c.-32-3C>G                                                 | p.?                        | <5                | C                        |
| exon2           | c.3G>A                                                     | p.(Met1?)                  | <5                | C                        |
| exon2           | c.40_47del                                                 | p.(Ala14ArgfsTer18)        | <5                | A                        |
| exon2           | c.118C>T                                                   | p.(Arg40Ter)               | 8                 | B,C                      |
| exon2           | c.236_246del                                               | p.(Pro79ArgfsTer12)        | <5                | A,B                      |
| exon2           | c.241C>T                                                   | p.(Gln81Ter)               | <5                | B,C                      |
| exon2           | c.258C>A                                                   | p.(Pro86Pro)               | <5                | C                        |
| exon2           | c.258dup                                                   | p.(Asn87fsTer9)            | 13                | A,B,C                    |
| exon2           | c.265C>T                                                   | p.(Arg89Cys)               | <5                | C                        |
| exon2           | c.266G>A                                                   | p.(Arg89His)               | <5                | A                        |
| exon2           | c.271G>A                                                   | p.(Asp91Asn)               | <5                | C                        |
| exon2           | c.271del                                                   | p.(Asp91fsTer51)           | <5                | C                        |
| exon2           | c.307T>C                                                   | p.(Cys103Arg)              | <5                | C                        |
| exon2           | c.307T>G                                                   | p.(Cys103Gly)              | 34                | A,B,C                    |
| exon2           | c.323G>A                                                   | p.(Cys108Ser)              | <5                | B                        |
| exon2           | c.340_341insT                                              | p.(Lys114fsTer32)          | 6                 | A                        |
| exon2           | c.352C>T                                                   | p.(Gln118Ter)              | <5                | A                        |
| exon2           | c.364A>G                                                   | p.(Met122Val)              | <5                | B,C                      |
| exon2           | c.365del                                                   | p.(Met122ArgfsTer20)       | <5                | C                        |
| exon2           | c.378_379del                                               | p.(Cys127LeufsTer18)       | <5                | A,C                      |
| exon2           | c.379_380del                                               | p.(Cys127LeufsTer18)       | <5                | C                        |
| exon2           | c.380G>A                                                   | p.(Cys127Tyr)              | <5                | C                        |
| exon2           | c.424_440del                                               | p.(Ser142LleufsTer29)      | <5                | B                        |
| exon2           | c.461_469del                                               | p.(Arg154_Thr156del)       | <5                | C                        |
| exon2           | c.482_483del                                               | p.(Pro161fsTer15)          | 7                 | C                        |
| exon2           | c.502C>T                                                   | p.(Arg168Trp)              | <5                | B                        |
| exon2           | c.510C>T                                                   | p.(Asp170Asp)              | <5                | B,C                      |
| exon2           | c.525_526del                                               | p.(Asn177ProfsTer11)       | 5                 | A,C                      |
| exon2           | c.525del                                                   | p.(Glu176ArgfsTer45)       | 111               | A,B,C                    |
| exon2           | c.546G>A                                                   | p.?                        | 9                 | B,C                      |
| intron2         | c.546+1G>T                                                 | p.?                        | <5                | C                        |
| intron2         | c.546+2_5del                                               | p.?                        | <5                | A                        |
| exon3           | c.568C>T                                                   | p.(Arg190Cys)              | <5                | B                        |
| exon3           | c.569G>A                                                   | p.(Arg190His)              | <5                | B,C                      |
| exon3           | c.572A>G                                                   | p.(Tyr191Cys)              | <5                | A,B                      |
| exon3           | c.573C>A                                                   | p.(Tyr191Ter)              | <5                | B,C                      |
| exon3           | c.655G>A                                                   | p.(Gly219Arg)              | 14                | A,B,C                    |
| exon3           | c.670C>T                                                   | p.(Arg224Trp)              | 16                | A,B,C                    |
| exon3           | c.691C>T                                                   | p.(Leu231Leu)              | <5                | B                        |

| Location | DNA <sup>‡</sup> | Protein <sup>§</sup>    | N Variants | Group <sup>¶</sup> |
|----------|------------------|-------------------------|------------|--------------------|
| intron3  | c.692+1G>C       | p.?                     | <5         | C                  |
| intron3  | c.692+5G>T       | p.?                     | 7          | B,C                |
| intron3  | c.693-1G>C       | p.?                     | <5         | C                  |
| exon4    | c.701C>A         | p.(Thr234Lys)           | <5         | B,C                |
| exon4    | c.716del         | p.(Leu239fsTer29)       | <5         | A                  |
| exon4    | c.722_723del     | p.(Phe241CysfsTer88)    | <5         | A                  |
| exon4    | c.742del         | p.(Leu248ProfsTer20)    | <5         | C                  |
| exon4    | c.743T>C         | p.(Leu248Pro)           | <5         | C                  |
| exon4    | c.752C>T         | p.(Ser251Leu)           | <5         | B                  |
| exon4    | c.761C>T         | p.(Ser254Leu)           | <5         | B                  |
| exon4    | c.784G>A         | p.(Glu262Lys)           | 12         | A,B,C              |
| exon4    | c.794del         | p.(Ser265IlefsTer3)     | <5         | A,C                |
| exon4    | c.811A>G         | p.(Thr271Ala)           | <5         | B                  |
| exon4    | c.827_845del     | p.(Ile276ThrfsTer32)    | <5         | C                  |
| exon4    | c.836G>A         | p.(Trp279Ter)           | <5         | C                  |
| exon4    | c.841C>T         | p.(Arg281Trp)           | <5         | B                  |
| exon4    | c.853C>T         | p.(Pro285Ser)           | <5         | C                  |
| exon4    | c.854C>G         | p.(Pro285Arg)           | <5         | A,C                |
| exon5    | c.868A>G         | p.(Asn290Asp)           | <5         | C                  |
| exon5    | c.871C>T         | p.(Leu291Phe)           | <5         | A,B                |
| exon5    | c.872T>C         | p.(Leu291Pro)           | <5         | A                  |
| exon5    | c.875A>G         | p.(Tyr292Cys)           | <5         | B                  |
| exon5    | c.877G>A         | p.(Gly293Arg)           | 10         | A,B,C              |
| exon5    | c.883C>A         | p.(His295Asn)           | <5         | C                  |
| exon5    | c.896T>C         | p.(Leu299Pro)           | <5         | B,C                |
| exon5    | c.923A>C         | p.(His308Pro)           | <5         | B,C                |
| exon5    | c.925G>A         | p.(Gly309Arg)           | 16         | A,B,C              |
| exon5    | c.947A>G         | p.(Asn316Ser)           | <5         | A                  |
| exon5    | c.953T>A         | p.(Met318Lys)           | <5         | B                  |
| exon5    | c.953T>C         | p.(Met318Thr)           | <5         | A                  |
| exon6    | c.989G>A         | p.(Trp330Ter)           | <5         | C                  |
| exon6    | c.1000G>T        | p.(Gly334Cys)           | <5         | A                  |
| exon6    | c.1003G>A        | p.(Gly335Arg)           | <5         | B                  |
| exon6    | c.1040C>G        | p.(Pro347Arg)           | <5         | C                  |
| exon6    | c.1047del        | p.(Ser349ArgfsTer43)    | <5         | B,C                |
| exon6    | c.1051del        | p.(Val351CysfsTer41)    | 6          | B,C                |
| exon6    | c.1062C>G        | p.(Tyr354Ter)           | <5         | A,B                |
| exon6    | c.1064T>C        | p.(Leu355Pro)           | 8          | A,B,C              |
| exon6    | c.1075G>A        | p.(Gly359Arg)           | <5         | C                  |
| intron6  | c.1075+13C>T     | p.?                     | <5         | A,B                |
| intron6  | c.1076-1G>A      | p.?                     | <5         | C                  |
| intron6  | c.1076-1G>C      | p.?                     | <5         | C                  |
| intron6  | c.1076-22T>G     | p.(Asp319_Val358delins) | 6          | B,C                |
| intron6  | c.1076-2A>G      | p.?                     | <5         | C                  |
| exon7    | c.1082C>T        | p.(Pro361Leu)           | 9          | A,B,C              |
| exon7    | c.1099T>C        | p.(Trp367Arg)           | <5         | A,B                |
| exon7    | c.1100G>A        | p.(Trp367Ter)           | <5         | B                  |
| exon7    | c.1106T>A        | p.(Leu369Gln)           | <5         | C                  |

| Location | DNA <sup>‡</sup>     | Protein <sup>§</sup>            | N Variants | Group <sup>¶</sup> |
|----------|----------------------|---------------------------------|------------|--------------------|
| exon7    | c.1115A>T            | p.(His372Leu)                   | 5          | A,C                |
| exon7    | c.1124G>A            | p.(Arg375His)                   | <5         | C                  |
| exon7    | c.1124G>T            | p.(Arg375Leu)                   | <5         | C                  |
| exon7    | c.1128_1129delinsC   | p.(Trp376CysfsTer16)            | 6          | B,C                |
| exon7    | c.1129G>C            | p.(Gly377Arg)                   | <5         | A                  |
| exon7    | c.1134C>G            | p.(Tyr378Ter)                   | <5         | C                  |
| exon7    | c.1143del            | p.(Ala382LeufsTer10)            | 6          | C                  |
| exon7    | c.1157dup            | p.(Val387GlyfsTer119)           | <5         | A                  |
| exon7    | c.1190C>T            | p.(Pro397Leu)                   | <5         | A,B,C              |
| exon7    | c.1193del            | p.(Leu398ArgfsTer42)            | <5         | C                  |
| intron7  | c.1194+2T>A          | p.?                             | <5         | C                  |
| intron7  | c.1195-2A>G          | p.?                             | <5         | A                  |
| intron7  | c.1195-8G>A          | p.?                             | <5         | C                  |
| exon8    | c.1197_1208del       | p.(Val400_Asn403del)            | <5         | A                  |
| exon8    | c.1210G>A            | p.(Asp404Asn)                   | 13         | A,B,C              |
| exon8    | c.1211A>G            | p.(Asp404Gly)                   | <5         | A,C                |
| exon8    | c.1219T>C            | p.(Tyr407His)                   | <5         | C                  |
| exon8    | c.1221C>A            | p.(Tyr407Ter)                   | <5         | A                  |
| exon8    | c.1222A>G            | p.(Met408Val)                   | <5         | C                  |
| exon8    | c.1239C>G            | p.(Asp413Glu)                   | <5         | C                  |
| exon8    | c.1281G>T            | p.(Met427Ile)                   | <5         | A                  |
| exon8    | c.1286A>G            | p.(Gln429Arg)                   | <5         | A                  |
| exon8    | c.1291_1299del       | p.(Leu431_Gln433del)            | <5         | C                  |
| exon8    | c.1293_1312del       | p.(Gln433AspfsTer66)            | <5         | B                  |
| exon8    | c.1309C>T            | p.(Arg437Cys)                   | <5         | C                  |
| exon8    | c.1316T>A            | p.(Met439Lys)                   | <5         | C                  |
| exon8    | c.1320_1322del       | p.(Met440del)                   | <5         | B                  |
| exon8-15 | c.1195-18_2190-20del | p.(Asp399ValfsTer6)             | <5         | A                  |
| intron8  | c.1326+1G>A          | p.?                             | <5         | C                  |
| intron8  | c.1327-2A>G          | p.?                             | <5         | A                  |
| exon9    | c.1333G>C            | p.(Ala445Pro)                   | <5         | B                  |
| exon9    | c.1354_1372del       | p.(Ala452_Pro458del_458fsTer19) | <5         | C                  |
| exon9    | c.1355del            | p.(Ser454AlafsTer23)            | <5         | C                  |
| exon9    | c.1370C>T            | p.(Pro457Leu)                   | <5         | B                  |
| exon9    | c.1373_1375del       | p.(Asp459del)                   | <5         | C                  |
| exon9    | c.1375G>A            | p.(Asp459Asn)                   | <5         | C                  |
| exon9    | c.1396G>T            | p.(Val466Phe)                   | <5         | A,C                |
| exon9    | c.1396del            | p.(Val466PhefsTer11)            | <5         | A,B,C              |
| exon9    | c.1402A>T            | p.(Ile468Phe)                   | 5          | A,B,C              |
| exon9    | c.1408_1410del       | p.(Asn470del)                   | <5         | A,B                |
| exon9    | c.1411_1414del       | p.(Glu471ProfsTer5)             | <5         | A                  |
| exon9    | c.1437G>A            | p.(Asp443_Lys479del)            | 6          | B,C                |
| intron9  | c.1437+1G>A          | p.?                             | <5         | A                  |
| intron9  | c.1437+2T>C          | p.(Asp443_Lys479del)            | <5         | A,B,C              |
| intron9  | c.1438-1G>C          | p.?                             | <5         | A,B,C              |
| intron9  | c.1438-1G>T          | p.?                             | <5         | C                  |
| intron9  | c.1438-2A>G          | p.?                             | <5         | B                  |

| Location | DNA <sup>‡</sup>   | Protein <sup>§</sup> | N Variants | Group <sup>¶</sup> |
|----------|--------------------|----------------------|------------|--------------------|
| exon10   | c.1441T>C          | p.(Trp481Arg)        | 7          | A,B,C              |
| exon10   | c.1441del          | p.(Trp481GlyfsTer39) | <5         | A                  |
| exon10   | c.1445C>G          | p.(Pro482Arg)        | <5         | C                  |
| exon10   | c.1445C>T          | p.(Pro482Leu)        | <5         | B                  |
| exon10   | c.1446del          | p.(Ser484ProfsTer36) | <5         | C                  |
| exon10   | c.1447G>A          | p.(Gly483Arg)        | 6          | A,B,C              |
| exon10   | c.1456G>C          | p.(Ala486Pro)        | <5         | C                  |
| exon10   | c.1456G>T          | p.(Ala486Ser)        | <5         | C                  |
| exon10   | c.1465G>A          | p.(Asp489Asn)        | 13         | A,B,C              |
| exon10   | c.1466A>G          | p.(Asp489Gly)        | <5         | A                  |
| exon10   | c.1478C>T          | p.(Pro493Leu)        | 6          | C                  |
| exon10   | c.1495T>A          | p.(Trp499Arg)        | <5         | B                  |
| exon10   | c.1496G>A          | p.(Trp499Ter)        | <5         | A                  |
| exon10   | c.1498_1512del     | p.(Asp501_Glu505del) | <5         | C                  |
| exon10   | c.1537G>A          | p.(Asp513Asn)        | <5         | B                  |
| exon10   | c.1548G>A          | p.(Trp516Ter)        | 17         | A,B,C              |
| intron10 | c.1551+1G>A        | p.(Val480_Ile517del) | <5         | C                  |
| intron10 | c.1551+1G>C        | p.(Val480_Ile517del) | 7          | C                  |
| intron10 | c.1551+1G>T        | p.(Val480_Ile517del) | <5         | A                  |
| intron10 | c.1551+3_1551+6del | p.(Val480_Ile517del) | <5         | C                  |
| intron10 | c.1551+49A>C       | p.?                  | <5         | C                  |
| exon11   | c.1556T>C          | p.(Met519Thr)        | <5         | B                  |
| exon11   | c.1560C>G          | p.(Asn520Lys)        | <5         | C                  |
| exon11   | c.1561G>A          | p.(Glu521Lys)        | 8          | A,B,C              |
| exon11   | c.1564C>A          | p.(Pro522Thr)        | <5         | B                  |
| exon11   | c.1564C>G          | p.(Pro522Ala)        | 9          | A,B,C              |
| exon11   | c.1564C>T          | p.(Pro522Ser)        | <5         | A                  |
| exon11   | c.1568C>A          | p.(Ser523Tyr)        | <5         | B                  |
| exon11   | c.1581A>G          | p.(Arg527Arg)        | <5         | C                  |
| exon11   | c.1583G>C          | p.(Gly528Ala)        | <5         | B                  |
| exon11   | c.1594G>A          | p.(Gly532Ser)        | <5         | C                  |
| exon11   | c.1610del          | p.(Glu537GlyfsTer41) | <5         | B,C                |
| exon11   | c.1634C>T          | p.(Pro545Leu)        | 7          | B,C                |
| exon11   | c.1636G>C          | p.(Gly546Ala)        | <5         | B                  |
| intron11 | c.1636+1G>C        | p.?                  | 5          | B,C                |
| intron11 | c.1637-2A>G        | p.?                  | <5         | A                  |
| exon12   | c.1642G>T          | p.(Val548Phe)        | <5         | A,C                |
| exon12   | c.1645G>C          | p.(Gly549Arg)        | <5         | B                  |
| exon12   | c.1650dup          | p.(Thr551AspfsTer85) | <5         | A                  |
| exon12   | c.1654del          | p.(Leu552SerfsTer26) | <5         | A                  |
| exon12   | c.1655T>C          | p.(Leu552Pro)        | 19         | A,B,C              |
| exon12   | c.1669A>T          | p.(Ile557Phe)        | <5         | B,C                |
| exon12   | c.1694_1697del     | p.(Leu565ProfsTer12) | <5         | C                  |
| exon12   | c.1703A>T          | p.(His568Leu)        | <5         | A,C                |
| exon12   | c.1705dup          | p.(Tyr569LeufsTer67) | <5         | A                  |
| exon12   | c.1710C>G          | p.(Asn570Lys)        | <5         | B,C                |
| exon12   | c.1716C>G          | p.(His572Gln)        | <5         | B                  |
| exon12   | c.1717A>C          | p.(Asn573His)        | <5         | C                  |

| Location | DNA <sup>‡</sup>   | Protein <sup>§</sup> | N Variants | Group <sup>¶</sup> |
|----------|--------------------|----------------------|------------|--------------------|
| exon12   | c.1724A>C          | p.(Tyr575Ser)        | <5         | A                  |
| exon12   | c.1726G>A          | p.(Gly576Ser)        | 17         | A,B,C              |
| exon12   | c.1735G>A          | p.(Glu579Lys)        | <5         | A,B,C              |
| exon12   | c.1748C>T          | p.(Ser583Phe)        | <5         | C                  |
| exon12   | c.1754G>A          | p.(Arg585Lys)        | <5         | C                  |
| intron12 | c.1754+1G>A        | p.?                  | <5         | A,C                |
| intron12 | c.1754+2T>A        | p.?                  | <5         | A                  |
| intron12 | c.1754+2T>C        | p.?                  | <5         | B                  |
| exon13   | c.1781G>A          | p.(Arg594His)        | <5         | B,C                |
| exon13   | c.1781G>C          | p.(Arg594Pro)        | <5         | B                  |
| exon13   | c.1796C>A          | p.(Ser599Tyr)        | <5         | A,B,C              |
| exon13   | c.1798C>T          | p.(Arg600Cys)        | 5          | A,B,C              |
| exon13   | c.1799G>A          | p.(Arg600His)        | 13         | A,B,C              |
| exon13   | c.1802C>G          | p.(Ser601Trp)        | <5         | A,C                |
| exon13   | c.1802C>T          | p.(Ser601Leu)        | <5         | A,C                |
| exon13   | c.1804A>G          | p.(Thr602Ala)        | <5         | B                  |
| exon13   | c.1819_1836del     | p.(Gly607_His612del) | <5         | B,C                |
| exon13   | c.1822C>T          | p.(Arg608Ter)        | 7          | A,B,C              |
| exon13   | c.1826dup          | p.(Tyr609Ter)        | <5         | C                  |
| exon13   | c.1827del          | p.(Tyr609Ter)        | <5         | B,C                |
| exon13   | c.1832G>A          | p.(Gly611Asp)        | <5         | C                  |
| exon13   | c.1835A>G          | p.(His612Arg)        | <5         | B                  |
| exon13   | c.1841C>A          | p.(Thr614Lys)        | 7          | A,B,C              |
| exon13   | c.1843G>A          | p.(Gly615Arg)        | 9          | A,B,C              |
| exon13   | c.1844G>A          | p.(Gly615Glu)        | 5          | A,B                |
| exon13   | c.1844_1846del     | p.(Gly615del)        | <5         | C                  |
| exon13   | c.1846G>A          | p.(Asp616Asn)        | <5         | A                  |
| exon13   | c.1856G>A          | p.(Ser619Asn)        | <5         | B                  |
| exon13   | c.1857C>G          | p.(Ser619Arg)        | <5         | B,C                |
| exon13   | c.1880C>T          | p.(Ser627Phe)        | 5          | A,C                |
| intron13 | c.1888+1G>A        | p.?                  | <5         | B,C                |
| exon14   | c.1903A>G          | p.(Asn635Asp)        | <5         | B                  |
| exon14   | c.1912G>T          | p.(Gly638Trp)        | 8          | A,B,C              |
| exon14   | c.1913G>A          | p.(Gly638Glu)        | <5         | A                  |
| exon14   | c.1913G>T          | p.(Gly638Val)        | <5         | B                  |
| exon14   | c.1923G>A          | p.(Leu641Leu)        | <5         | C                  |
| exon14   | c.1924G>T          | p.(Val642Phe)        | <5         | B                  |
| exon14   | c.1927G>A          | p.(Gly643Arg)        | 21         | A,B,C              |
| exon14   | c.1933G>A          | p.(Asp645Asn)        | 14         | A,B,C              |
| exon14   | c.1933G>C          | p.(Asp645His)        | <5         | A                  |
| exon14   | c.1933G>T          | p.(Asp645Tyr)        | <5         | A,C                |
| exon14   | c.1935C>A          | p.(Asp645Glu)        | 42         | A,B,C              |
| exon14   | c.1941C>G          | p.(Cys647Trp)        | <5         | A,C                |
| exon14   | c.1942G>A          | p.(Gly648Ser)        | 7          | A,C                |
| exon14   | c.1951_1952delinsT | p.(Gly651SerfsTer45) | <5         | C                  |
| exon14   | c.1962_1964del     | p.(Glu656del)        | <5         | A,C                |
| exon14   | c.1978C>T          | p.(Arg660Cys)        | <5         | B                  |
| exon14   | c.1979G>A          | p.(Arg660His)        | 9          | A,B,C              |

| Location | DNA <sup>‡</sup>                         | Protein <sup>§</sup> | N Variants | Group <sup>¶</sup> |
|----------|------------------------------------------|----------------------|------------|--------------------|
| exon14   | c.1993G>A                                | p.(Gly665Arg)        | <5         | B                  |
| exon14   | c.2014C>T                                | p.(Arg672Trp)        | 7          | B,C                |
| exon14   | c.2015G>A                                | p.(Arg672Gln)        | 5          | A,B,C              |
| exon14   | c.2023_2025del                           | p.(Asn675del)        | <5         | A                  |
| exon14   | c.2024_2026del                           | p.(Asn675del)        | <5         | A                  |
| exon14   | c.2040G>A                                | p.?                  | <5         | A                  |
| intron14 | c.2041-1G>A                              | p.?                  | <5         | C                  |
| exon15   | c.2051C>T                                | p.(Pro684Leu)        | <5         | A                  |
| exon15   | c.2055C>A                                | p.(Tyr685Ter)        | <5         | C                  |
| exon15   | c.2066_2070dup                           | p.(Ala691fsTer6)     | <5         | C                  |
| exon15   | c.2078dup                                | p.(Ala694GlnfsTer42) | <5         | A                  |
| exon15   | c.2104C>T                                | p.(Arg702Cys)        | <5         | A,B,C              |
| exon15   | c.2105G>A                                | p.(Arg702His)        | <5         | B                  |
| exon15   | c.2105G>T                                | p.(Arg702Leu)        | <5         | A,C                |
| exon15   | c.2132C>G                                | p.(Thr711Arg)        | <5         | B,C                |
| exon15   | c.2135T>C                                | p.(Leu712Pro)        | <5         | B,C                |
| exon15   | c.2136_2137del                           | p.(Phe713ProfsTer23) | <5         | C                  |
| exon15   | c.2161G>T                                | p.(Glu721Ter)        | <5         | B                  |
| exon15   | c.2173C>T                                | p.(Arg725Trp)        | 8          | A,C                |
| intron15 | c.2189+1G>A                              | p.?                  | <5         | B                  |
| exon16   | c.2210C>A                                | p.(Thr737Asn)        | <5         | B                  |
| exon16   | c.2214G>A                                | p.(Trp738Ter)        | <5         | B,C                |
| exon16   | c.2219_2220del                           | p.(Val740GlyfsTer55) | <5         | A,C                |
| exon16   | c.2222A>T                                | p.(Asp741Val)        | <5         | C                  |
| exon16   | c.2227C>T                                | p.(Gln743Ter)        | <5         | A                  |
| exon16   | c.2228A>G                                | p.(Gln743Arg)        | 5          | B,C                |
| exon16   | c.2236T>C                                | p.(Trp746Arg)        | <5         | A                  |
| exon16   | c.2237G>A                                | p.(Trp746Ter)        | 20         | A,B,C              |
| exon16   | c.2237G>C                                | p.(Trp746Ser)        | <5         | B                  |
| exon16   | c.2238G>A                                | p.(Trp746Ter)        | <5         | A,B                |
| exon16   | c.2238G>C                                | p.(Trp746Cys)        | 38         | B,C                |
| exon16   | c.2242G>T                                | p.(Glu748Ter)        | <5         | C                  |
| exon16   | c.2242dup                                | p.(Glu748fsTer48)    | 9          | B,C                |
| exon16   | c.2269C>T                                | p.(Gln757Ter)        | <5         | C                  |
| exon16   | c.2274dup                                | p.(Gly759ArgfsTer6)  | <5         | A                  |
| exon16   | c.2281delinsAT                           | p.(Ala761fs)         | <5         | B,C                |
| exon16   | c.2294G>A                                | p.(Gly765Asp)        | <5         | A                  |
| exon16   | c.2296T>A                                | p.(Tyr766Asn)        | <5         | A                  |
| exon16   | c.2297A>C                                | p.(Tyr766Ser)        | 8          | A,B,C              |
| exon16   | c.2297A>G                                | p.(Tyr766Cys)        | <5         | B                  |
| exon16   | c.2298_2301delinsAAAGTA                  | p.(Tyr766Ter)        | <5         | C                  |
| exon16   | c.2303C>T                                | p.(Pro768Leu)        | <5         | A                  |
| exon16   | c.2320G>A                                | p.(Asn774Asn)        | <5         | C                  |
| exon16   | c.2322_2323insGGTGAGTC<br>TGCAAACGGGGAGT | p.(Leu775GlyfsTer70) | <5         | C                  |
| intron16 | c.2331+1G>A                              | p.?                  | <5         | A                  |
| intron16 | c.2331+20A>G                             | p.?                  | <5         | B,C                |
| intron16 | c.2331+2T>A                              | p.?                  | <5         | A,B,C              |



| Location | DNA <sup>‡</sup>      | Protein <sup>§</sup> | N Variants | Group <sup>¶</sup> |
|----------|-----------------------|----------------------|------------|--------------------|
| exon17   | c.2338A>G             | p.(Ile780Val)        | <5         | C                  |
| exon17   | c.2395C>T             | p.(His799Tyr)        | <5         | C                  |
| exon17   | c.2408_2426del        | p.(Gln803ProfsTer39) | <5         | A                  |
| exon17   | c.2431del             | p.(Leu811TrpfsTer37) | <5         | B,C                |
| exon17   | c.2431dup             | p.(Leu811fsTer73)    | <5         | B                  |
| exon17   | c.2446G>A             | p.(Val816Ile)        | <5         | B                  |
| exon17   | c.2474C>G             | p.(Pro825Arg)        | <5         | B,C                |
| intron17 | c.2481+102_2646+31del | p.(Gly828_Asn882del) | 80         | A,B,C              |
| exon18   | c.2495_2496del        | p.(Thr832AsnfsTer51) | 6          | A,B                |
| exon18   | c.2501_2502del        | p.(Thr834ArgfsTer49) | <5         | A,B                |
| exon18   | c.2512C>T             | p.(Gln838Ter)        | <5         | A,C                |
| exon18   | c.2528T>C             | p.(Leu843Pro)        | <5         | A                  |
| exon18   | c.2530_2541del        | p.(Arg844_Leu847del) | 10         | B,C                |
| exon18   | c.2544del             | p.(Lys849ArgfsTer39) | <5         | C                  |
| exon18   | c.2560C>T             | p.(Arg854Ter)        | 45         | A,B,C              |
| exon18   | c.2604del             | p.(Leu868fs)         | <5         | C                  |
| exon18   | c.2608C>T             | p.(Arg870Ter)        | 17         | A,B,C              |
| intron18 | c.2646+2T>A           | p.(Val876_Asn882del) | <5         | A                  |
| intron18 | c.2647-20T>G          | p.?                  | <5         | C                  |
| exon19   | c.2662G>T             | p.(Glu888Ter)        | 14         | A,B,C              |
| exon19   | c.2706del             | p.(Lys903ArgfsTer2)  | <5         | C                  |
| exon19   | c.2707_2709del        | p.(Lys903del)        | <5         | A                  |
| exon19   | c.2725G>A             | p.(Val909Met)        | <5         | B                  |
| exon19   | c.2738C>G             | p.(Pro912Arg)        | <5         | B,C                |
| exon19   | c.2741delinsGAC       | p.(Gln914fsTer30)    | <5         | A                  |
| exon19   | c.2744A>C             | p.(Gln915Pro)        | <5         | B                  |
| exon19   | c.2770T>C             | p.(Ser924Pro)        | <5         | A                  |
| exon19   | c.2780C>T             | p.(Thr927Ile)        | <5         | C                  |
| intron19 | c.2799+4A>G           | p.?                  | <5         | C                  |
| exon20   | c.2815_2816del        | p.(Val939LeufsTer78) | 5          | A,B,C              |
| exon20   | c.2841_2842insT       | p.(Leu948SerfsTer70) | <5         | A                  |
| exon20   | c.2846T>A             | p.(Val949Asp)        | <5         | A                  |

<sup>†</sup>The phenotypic subgroups are defined as follows. Group A: onset of symptoms  $\leq 12$  months of age with cardiomyopathy (patients classified as classic infantile Pompe disease); Group B: onset of symptoms  $\leq 12$  years of age (includes patients with onset of symptoms  $\leq 12$  months of age without cardiomyopathy and not included in Group A); Group C: onset of symptoms  $> 12$  years of age.

<sup>‡</sup>c.1726G>A is a common pseudodeficiency variant and is linked to other variants (see main text).

<sup>§</sup>The protein is provided where data were available. The value p.? is used to indicate that the impact on the RNA is unknown.

<sup>¶</sup>Designates the phenotypic subgroup(s) of patients in which a variant is reported: Group A, Group B, and/or Group C.

Note: Impact of the variants in the table is provided in the Pompe disease mutation database at <http://www.pompecenter.nl> (>molecular aspects>Pompe variants database).

**SUPPORTING INFORMATION TABLE S2.** Novel Variants (with Appropriate Consent<sup>†</sup>) from the Pompe Registry Submitted to, and Accepted by, the Single Nucleotide Polymorphism Database (dbSNP) with submission ID SUB4205047 (<http://www.ncbi.nlm.nih.gov/SNP/>) and the Leiden Open Variation Database (LOVD; <https://www.lovd.nl/>).

| <b>Variant</b> | <b>Protein</b>       | <b>Genomic Location of Variant</b>    | <b>dbSNP Submission Number</b> | <b>LOVD Variant ID</b> |
|----------------|----------------------|---------------------------------------|--------------------------------|------------------------|
| c.665T>G       | p.(Val222Gly)        | NC_000017.10:g.78079666T>G            | ss2137543935                   | 0000500691             |
| c.692T>C       | p.(Leu231Pro)        | NC_000017.10:g.78079693T>C            | ss3654261701                   | 0000500692             |
| c.692+1G>T     | p.?                  | NC_000017.10:g.78079694G>T            | ss3654261702                   | 0000500693             |
| c.693-2A>C     | p.?                  | NC_000017.10:g.78081354A>C            | ss3654261703                   | 0000500694             |
| c.766_784del   | p.(Tyr256SerfsTer6)  | NC_000017.10:g.78081429_78081447del   | ss3654261704                   | 0000500695             |
| c.878G>T       | p.(Gly293Val)        | NC_000017.10:g.78081618G>T            | ss3654261705                   | 0000500696             |
| c.930_932del   | p.(Phe311del)        | NC_000017.10:g.78081670_78081672del   | ss3654261706                   | 0000500697             |
| c.950C>T       | p.(Ala317Val)        | NC_000017.10:g.78081690C>T            | ss3654261707                   | 0000500698             |
| c.994_995insTT | p.(Ser332PhefsTer61) | NC_000017.10:g.78082127_78082128insTT | ss3654261708                   | 0000500699             |
| c.1109G>A      | p.(Gly370Asp)        | NC_000017.10:g.78082321G>A            | ss3654261709                   | 0000500700             |
| c.1114C>G      | p.(His372Asp)        | NC_000017.10:g.78082326C>G            | ss3654261710                   | 0000500701             |
| c.1114C>T      | p.(His372Tyr)        | NC_000017.10:g.78082326C>T            | ss3654261711                   | 0000500702             |
| c.1121G>A      | p.(Cys374Tyr)        | NC_000017.10:g.78082333G>A            | ss3654261712                   | 0000500703             |
| c.1211A>T      | p.(Asp404Val)        | NC_000017.10:g.78082512A>T            | ss3654261713                   | 0000500704             |
| c.1388_1406del | p.(Arg463ProfsTer8)  | NC_000017.10:g.78083805_78083823del   | ss3654261714                   | 0000500705             |
| c.1409A>G      | p.(Asn470Ser)        | NC_000017.10:g.78083826A>G            | ss3654261715                   | 0000500853             |
| c.1477C>T      | p.(Pro493Ser)        | NC_000017.10:g.78084565C>T            | ss3654261717                   | 0000500854             |
| c.1526A>T      | p.(Gln509Leu)        | NC_000017.10:g.78084614A>T            | ss3654261718                   | 0000500855             |
| c.1551+3A>T    | p.?                  | NC_000017.10:g.78084642A>T            | ss3654261719                   | 0000500856             |
| c.1559A>G      | p.(Asn520Ser)        | NC_000017.10:g.78084747A>G            | ss3654261720                   | 0000500857             |
| c.1670T>G      | p.(Ile557Ser)        | NC_000017.10:g.78085815T>G            | ss3654261721                   | 0000500858             |
| c.1681_1699dup | p.(Thr567LysfsTer75) | NC_000017.10:g.78085826_78085844dup1  | ss3654261722                   | 0000500859             |
| c.1754+1dup    | p.?                  | NC_000017.10:g.78085900dup            | ss3654261723                   | 0000500860             |
| c.1825T>G      | p.(Tyr609Asp)        | NC_000017.10:g.78086447T>G            | ss3654261724                   | 0000500861             |
| c.1839G>C      | p.(Trp613Cys)        | NC_000017.10:g.78086461G>C            | ss3654261725                   | 0000500863             |
| c.1847dup      | p.(Asp61GlufsTer20)  | NC_000017.10:g.78086469dup            | ss3654261726                   | 0000500862             |
| c.1876_1878del | p.(Ser627del)        | NC_000017.10:g.78086498_78086500del   | ss3654261727                   | 0000500864             |
| c.1944_1950del | p.(Phe649AlafsTer45) | NC_000017.10:g.78086730_78086736del   | ss3654261728                   | 0000500865             |
| c.1961C>G      | p.(Ser654Ter)        | NC_000017.10:g.78086747C>G            | ss3654261729                   | 0000500866             |
| c.2020C>T      | p.(His674Tyr)        | NC_000017.10:g.78086806C>T            | ss3654261730                   | 0000500867             |

| <b>Variant</b>          | <b>Protein</b>        | <b>Genomic Location of Variant</b>           | <b>dbSNP Submission Number</b> | <b>LOVD Variant ID</b> |
|-------------------------|-----------------------|----------------------------------------------|--------------------------------|------------------------|
| c.2041-2A>G             | p.?                   | NC_000017.10:g.78087015A>G                   | ss3654261731                   | 0000500868             |
| c.2084dup               | p.(Met695IlefsTer70)  | NC_000017.10:g.78087060dup                   | ss3654261732                   | 0000500869             |
| c.2096T>C               | p.(Leu699Pro)         | NC_000017.10:g.78087072T>C                   | ss3654261733                   | 0000500870             |
| c.2109del               | p.(Tyr703Ter)         | NC_000017.10:g.78087085del                   | ss3654261734                   | 0000500872             |
| c.2146G>C6/14/20        | p.(Ala716Pro)         | NC_000017.10:g.78087122G>C                   | ss3654261735                   | 0000500873             |
| c.2153_2156delinsACGCCG | p.(Val718AspfsTer47)  | NC_000017.10:g.78087129_78087132delinsACGCCG | ss3654261736                   | 0000500874             |
| c.2237G>T               | p.(Trp746Leu)         | NC_000017.10:g.78090814G>T                   | ss3654261737                   | 0000500875             |
| c.2240G>A               | p.(Gly747Glu)         | NC_000017.10:g.78090817G>A                   | ss3654261738                   | 0000500876             |
| c.2258_2259insC         | p.(Val755SerfsTer41)  | NC_000017.10:g.78090835_78090836insC         | ss3654261739                   | 0000500877             |
| c.2261dup               | p.(Val755LysfsTer10)  | NC_000017.10:g.78090838dup                   | ss3654261740                   | 0000500878             |
| c.2331+101del           | p.?                   | NC_000017.10:g.78091009del536                | ss3654261741                   | 0000500879             |
| c.2407C>T               | p.(Gln803Ter)         | NC_000017.10:g.78091474C>T                   | ss3654261742                   | 0000500880             |
| c.2459_2461del          | p.(Ala820del)         | NC_000017.10:g.78091526_78091528del          | ss3654261743                   | 0000500881             |
| c.2460dup               | p.(Gly821TrpfsTer63)  | NC_000017.10:g.78091527dup                   | ss3654261744                   | 0000500882             |
| c.2480A>G               | p.(Gln827Arg)         | NC_000017.10:g.78091547A>G                   | ss3654261745                   | 0000500883             |
| c.2515C>T               | p.(Gln839Ter)         | NC_000017.10:g.78092025C>T                   | ss3654261746                   | 0000500884             |
| c.2619C>G               | p.(Tyr873Ter)         | NC_000017.10:g.78092129C>G                   | ss3654261747                   | 0000500885             |
| c.2655_2656del          | p.(Val886GlufsTer2)   | NC_000017.10:g.78092460_                     | ss3654261748                   | 0000500886             |
| c.2720T>C               | p.(Leu907Pro)         | NC_000017.10:g.78092525T>C                   | ss3654261749                   | 0000500887             |
| c.2740dup               | p.(Gln914ProfsTer104) | NC_000017.10:g.78092545dup                   | ss3654261750                   | 0000500888             |
| c.2742dup               | p.(Gln915AlafsTer10)  | NC_000017.10:g.78092547dup                   | ss3654261751                   | 0000500890             |
| c.2757del               | p.(Asn919LysfsTer24)  | NC_000017.10:g.78092562del                   | ss3654261752                   | 0000500891             |
| c.2800-1G>C             | p.?                   | NC_000017.10:g.78093070G>C                   | ss3654261753                   | 0000500893             |

† Informed written patient consent is required to share patient data submitted to the Pompe Registry (see Methods of the main manuscript). Not all Registry patients agree to have their data shared. Only novel GAA variants for which appropriate updated patient consent was available were submitted to the Single Nucleotide Polymorphism Database (dbSNP) and the Leiden Open Variation Database (LOVD)
